# Supplementary material for: Ceria-promoted Co@NC catalyst for biofuel upgrade: synergy between ceria and cobalt species
Source: Royal Society of Chemistry journal article supplement (doi:10.1039/d0ta11941e), 2021-01-01
Supplement: d0ta11941e1.pdf [file d0ta11941e1.pdf]

### Supporting Information

#### Ceria promoted Co@NC catalyst for biofuel upgrade: synergy between ceria and cobalt species

Bowei Wang<sup>abc</sup>, Ruixiao Gao<sup>a</sup>, Dan Zhang<sup>a</sup>, Yuyao Zeng<sup>a</sup>, Fangying Zhang<sup>a</sup>, Xilong Yan<sup>abc</sup>, Yang Li<sup>abc\*</sup>, Ligong Chen<sup>abc\*</sup>

<sup>a</sup> School of Chemical Engineering and Technology, Tianjin University, Tianjin 300350, P. R. China.

<sup>b</sup> Collaborative Innovation Center of Chemical Science and Engineering (Tianjin), Tianjin 300072, P. R. China.

<sup>c</sup> Tianjin Engineering Research Center of Functional Fine Chemicals, Tianjin, P. R. China.

\* Corresponding authors. E-mail: lgchen@tju.edu.cn (L. Chen); liyang777@tju.edu.cn (Y. Li)

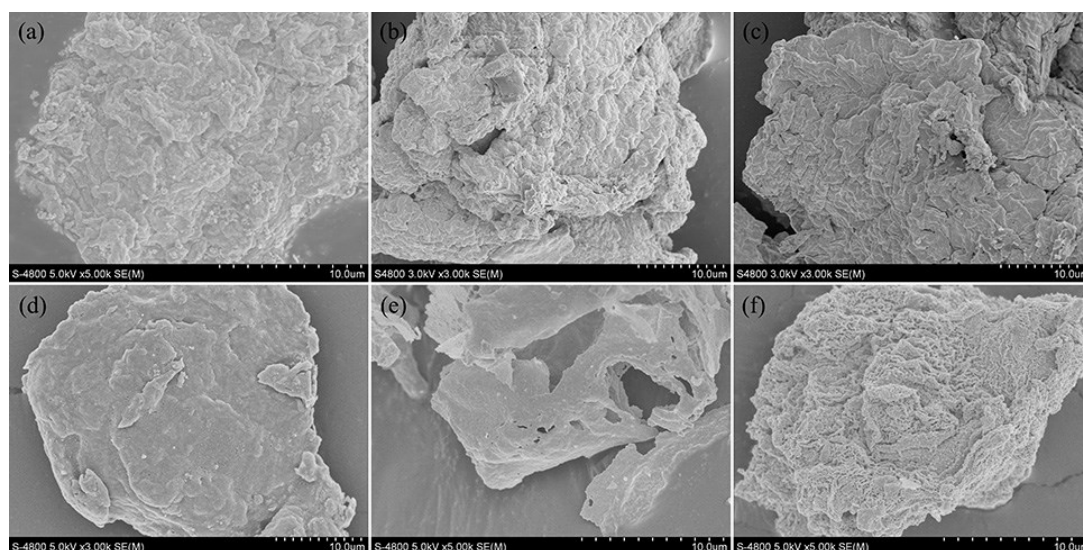

Fig. S1. SEM images of (a) Co/Ce@NC-700, (b) Co/Ce@NC, (c) Co/Ce@NC-1000, (d) Co@NC, (e) Co/Ce, and (f) Ce@NC.

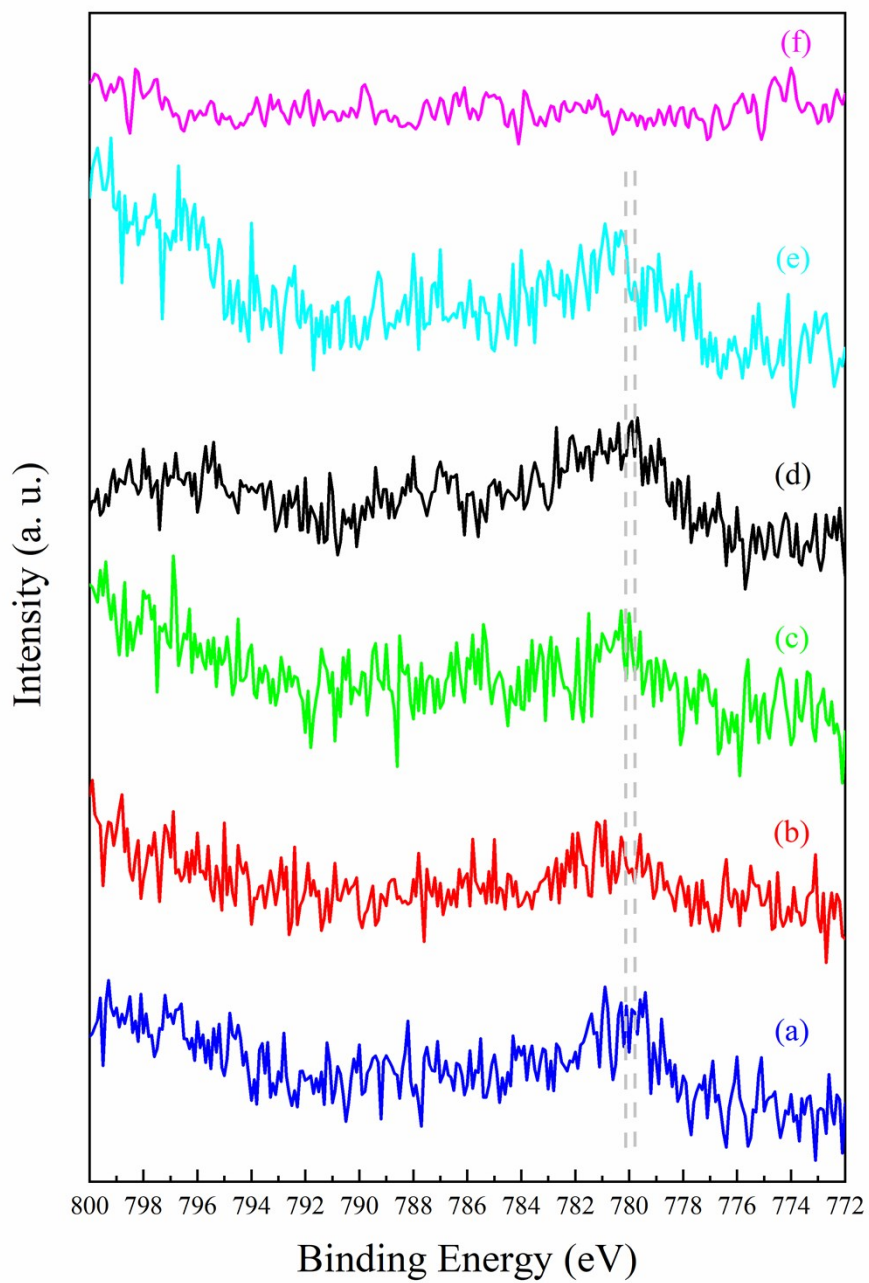

Fig. S2. High-resolution XPS spectra of Co 2p region for (a) Co/Ce@NC-700, (b) Co/Ce@NC, (c) Co/Ce@NC-1000, (d) Co@NC, (e) Co/Ce, and (f) Ce@NC.

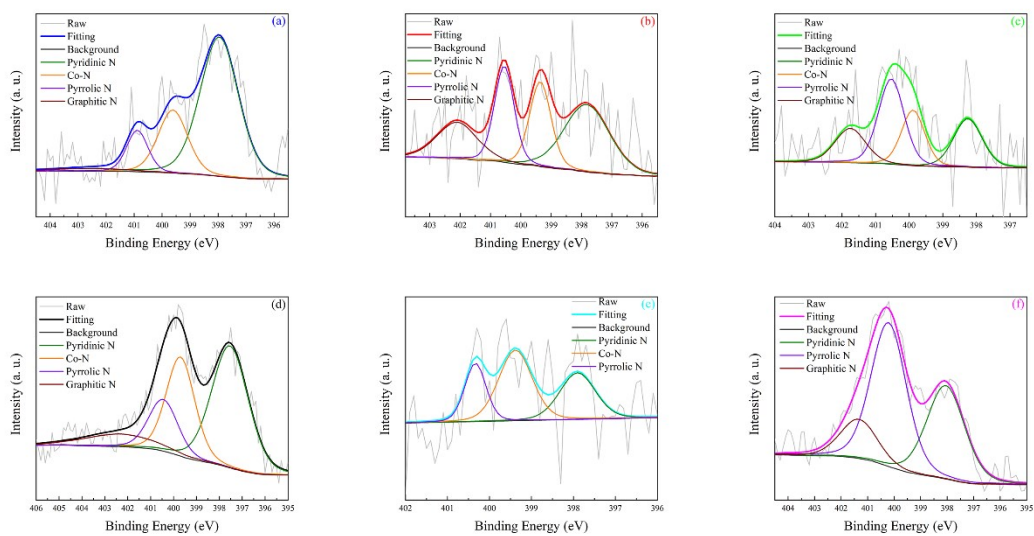

Fig. S3. High-resolution XPS spectra of N 1s region for (a) Co/Ce@NC-700, (b) Co/Ce@NC, (c) Co/Ce@NC-1000, (d) Co@NC, (e) Co/Ce, and (f) Ce@NC.

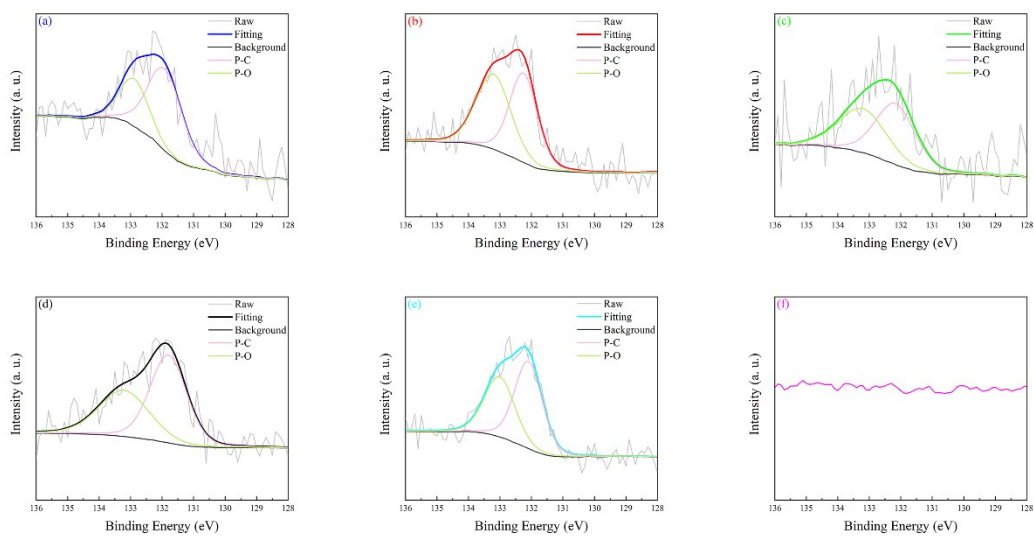

Fig. S4. High-resolution XPS spectra of P 2p region for (a) Co/Ce@NC-700, (b) Co/Ce@NC, (c) Co/Ce@NC-1000, (d) Co@NC, (e) Co/Ce, and (f) Ce@NC.

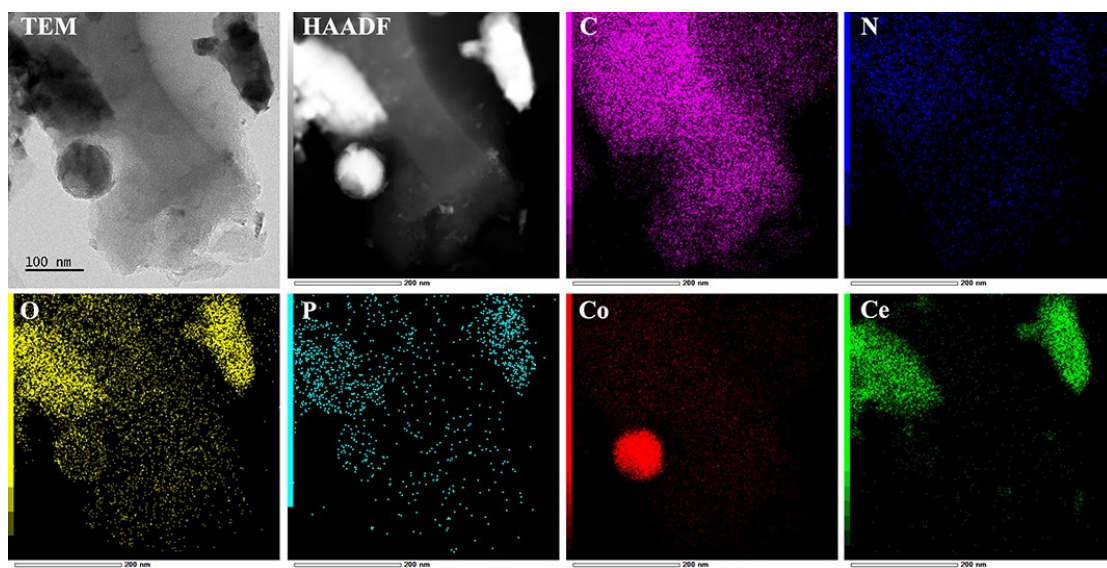

Fig. S5. TEM, HAADF, and EDS mapping images of Co-CeO<sub>2</sub>@NC.

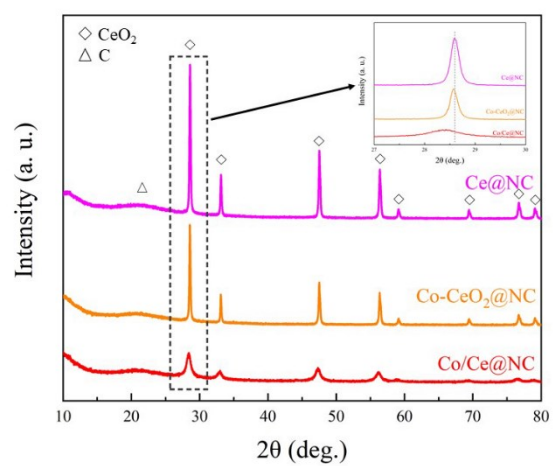

Fig. S6. XRD patterns of Co/Ce@NC, Co-CeO<sub>2</sub>@NC, and Ce@NC.

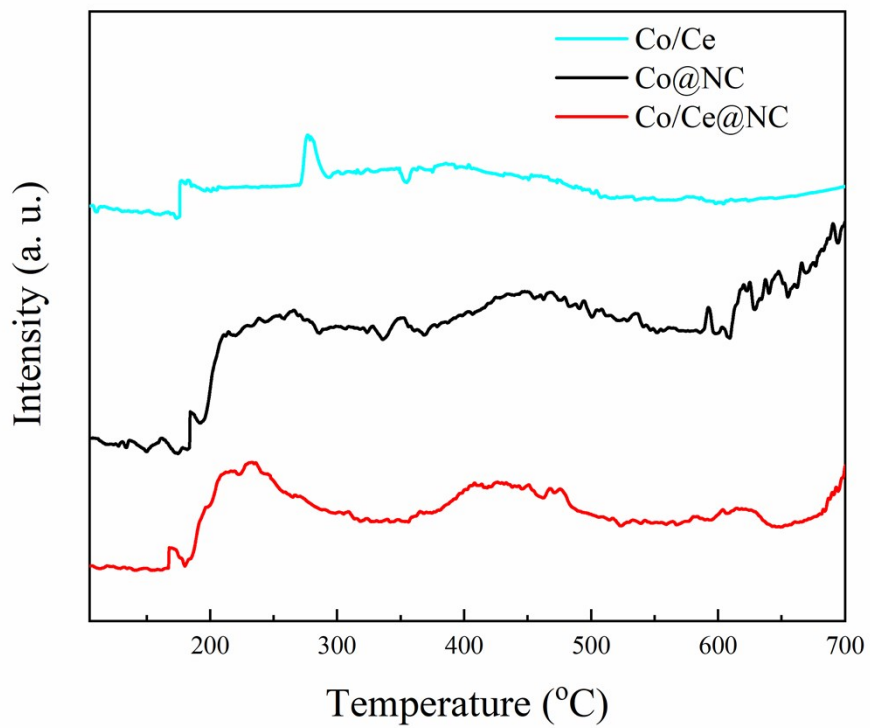

Fig. S7. NH<sub>3</sub>-TPD profiles of Co/Ce@NC, Co@NC, and Co/Ce.

### Computational methods <sup>S13-15</sup>

All static calculations were carried out using spin-polarized density functional theory (DFT) with generalized gradient approximation (GGA) of Perdew-Burke-Ernzerhof (PBE) as implemented in VASP 5.4.4. The cutoff energy of plane-wave basis set is 400 eV and 3 3 1 K-points grid sampling was used for Brillouin zone integration. Atomic positions were optimized by conjugate gradient algorithm until the forces were less than 0.03 eV/Å. Transition states were searched by climbing image nudged elastic-band method (CI-NEB) and further confirmed by vibrational frequency analysis.

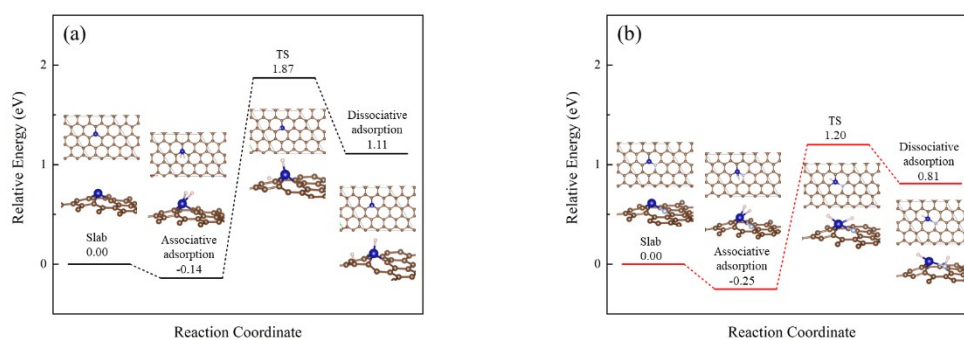

Fig. S8. Relative energy diagram of catalytic H<sub>2</sub> dissociation over Co-loaded graphene without nitrogen species (a) and with pyridine nitrogen species (b).



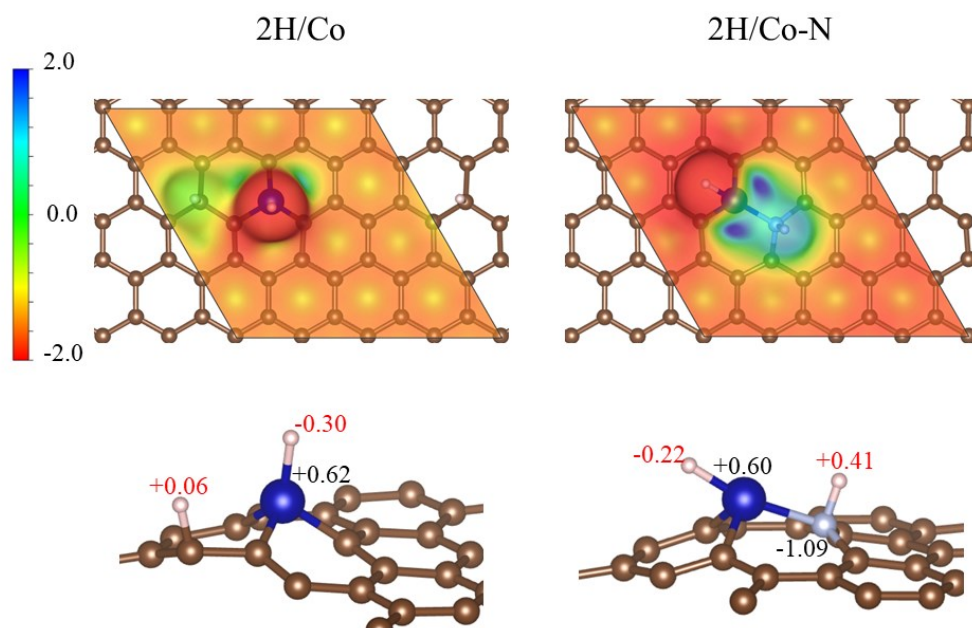

Fig. S9. Electron-density isosurfaces of 2H/Co and 2H/Co-N. The electron-density isosurfaces are plotted at  $0.005 \text{ e} \cdot \text{bohr}^{-1}$ . The color bar represents the electrostatic potential scale.

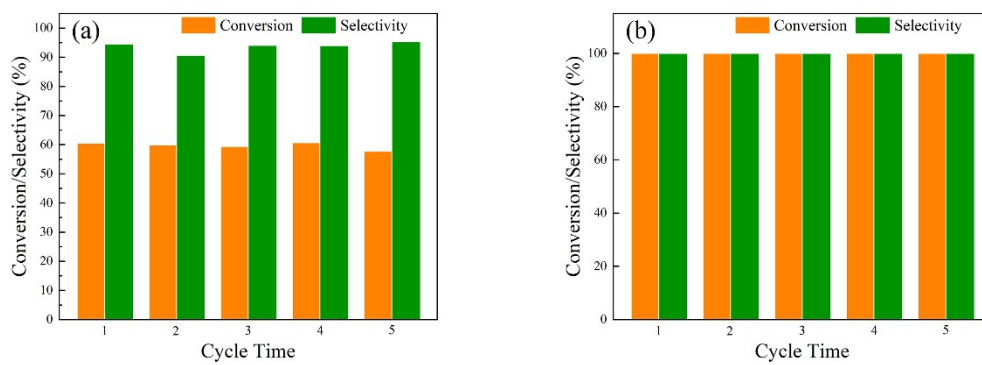

Fig. S10. Stability of Co/Ce@NC. Reaction conditions: vanillin (0.13 mmol); 2 mL ethanol; 5 mol% catalyst; 170 °C; 1 MPa H<sub>2</sub>; 3 h (a) or 6 h (b).

Table S1. Summarization for preparation details of catalysts in this work.

| Sample <sup>a</sup>     | Active metal source                                     | Carbon source       | Additive (Source)                                                                                | Pyrolysis temperature |
|-------------------------|---------------------------------------------------------|---------------------|--------------------------------------------------------------------------------------------------|-----------------------|
| Co/Ce@NC                | vitamin B <sub>12</sub>                                 | chitosan            | CeO <sub>2</sub><br>(Ce(NO <sub>3</sub> ) <sub>3</sub> ·6H <sub>2</sub> O, 0.63 g)               | 850 °C                |
| Co/Ce@NC-700            | vitamin B <sub>12</sub>                                 | chitosan            | CeO <sub>2</sub><br>(Ce(NO <sub>3</sub> ) <sub>3</sub> ·6H <sub>2</sub> O, 0.63 g)               | 700 °C                |
| Co/Ce@NC-1000           | vitamin B <sub>12</sub>                                 | chitosan            | CeO <sub>2</sub><br>(Ce(NO <sub>3</sub> ) <sub>3</sub> ·6H <sub>2</sub> O, 0.63 g)               | 1000 °C               |
| Co/Ce@C                 | vitamin B <sub>12</sub>                                 | glucose             | CeO <sub>2</sub><br>(Ce(NO <sub>3</sub> ) <sub>3</sub> ·6H <sub>2</sub> O, 0.63 g)               | 850 °C                |
| Co/Ce@NC (WP)           | Co(CH <sub>3</sub> COO) <sub>2</sub> ·4H <sub>2</sub> O | chitosan            | CeO <sub>2</sub><br>(Ce(NO <sub>3</sub> ) <sub>3</sub> ·6H <sub>2</sub> O, 0.63 g)               | 850 °C                |
| Co/Ce                   | vitamin B <sub>12</sub>                                 | -                   | CeO <sub>2</sub><br>(Ce(NO <sub>3</sub> ) <sub>3</sub> ·6H <sub>2</sub> O, 1.26 g)               | 850 °C                |
| Co-CeO <sub>2</sub> @NC | vitamin B <sub>12</sub>                                 | chitosan            | CeO <sub>2</sub><br>(CeO <sub>2</sub> )                                                          | 850 °C                |
| Ce@NC                   | -                                                       | chitosan            | CeO <sub>2</sub><br>(Ce(NO <sub>3</sub> ) <sub>3</sub> ·6H <sub>2</sub> O, 0.63 g)               | 850 °C                |
| Co@NC                   | vitamin B <sub>12</sub>                                 | chitosan<br>(2.5 g) | -                                                                                                | 850 °C                |
| Co@C                    | vitamin B <sub>12</sub>                                 | glucose<br>(2.5 g)  | -                                                                                                | 850 °C                |
| Fe/Ce@NC                | Fe(CH <sub>3</sub> COO) <sub>2</sub> ·4H <sub>2</sub> O | chitosan            | CeO <sub>2</sub><br>(Ce(NO <sub>3</sub> ) <sub>3</sub> ·6H <sub>2</sub> O, 0.63 g)               | 850 °C                |
| Cu/Ce@NC                | Cu(CH <sub>3</sub> COO) <sub>2</sub> ·H <sub>2</sub> O  | chitosan            | CeO <sub>2</sub><br>(Ce(NO <sub>3</sub> ) <sub>3</sub> ·6H <sub>2</sub> O, 0.63 g)               | 850 °C                |
| Ni/Ce@NC                | Ni(CH <sub>3</sub> COO) <sub>2</sub> ·4H <sub>2</sub> O | chitosan            | CeO <sub>2</sub><br>(Ce(NO <sub>3</sub> ) <sub>3</sub> ·6H <sub>2</sub> O, 0.63 g)               | 850 °C                |
| Co/Al@NC                | vitamin B <sub>12</sub>                                 | chitosan            | Al <sub>2</sub> O <sub>3</sub><br>(Al(NO <sub>3</sub> ) <sub>3</sub> ·9H <sub>2</sub> O, 1.84 g) | 850 °C                |
| Co/Si@NC                | vitamin B <sub>12</sub>                                 | chitosan            | SiO <sub>2</sub><br>(nano-SiO <sub>2</sub> , 20 nm)                                              | 850 °C                |
| Co/Ti@NC                | vitamin B <sub>12</sub>                                 | chitosan            | TiO <sub>2</sub><br>(nano-TiO <sub>2</sub> , 20 nm)                                              | 850 °C                |

<sup>a</sup> General preparation procedure: Initially, the suspension of active metal source (active metal 0.13 mmol), additive (0.25 g), and carbon source (1.25 g) in 80 vol% ethanol (60 mL) was stirred under refluxing for 4 h. Subsequently, the solvent was slowly removed under vacuum. The obtained solid was dried in vacuum at 60 °C and then grounded into a fine powder. Finally, the powder was pyrolyzed at 850 °C for 2 h under argon atmosphere to yield the catalyst.

Table S2. Surface N content, peak positions and relative amount of nitrogen species for Co/Ce@NC-700, Co/Ce@NC, Co/Ce@NC-1000, Co@NC, Co/Ce, and Ce@NC based on XPS analysis

| Sample        | Surface N Content (wt%) | Pyridinic N |           | Co-N    |           | Pyrrolic N |           | Graphitic N |           |
|---------------|-------------------------|-------------|-----------|---------|-----------|------------|-----------|-------------|-----------|
|               |                         | BE (eV)     | Ratio (%) | BE (eV) | Ratio (%) | BE (eV)    | Ratio (%) | BE (eV)     | Ratio (%) |
| Co/Ce@NC-700  | 4.18                    | 398.0       | 64.49     | 399.6   | 22.50     | 400.9      | 10.62     | 402.5       | 2.39      |
| Co/Ce@NC      | 2.50                    | 397.8       | 37.19     | 399.4   | 22.08     | 400.5      | 22.97     | 402.1       | 17.76     |
| Co/Ce@NC-1000 | 1.51                    | 398.3       | 23.32     | 399.9   | 21.92     | 400.5      | 36.97     | 401.8       | 17.79     |
| Co@NC         | 3.56                    | 397.5       | 46.02     | 399.7   | 29.18     | 400.5      | 15.56     | 402.3       | 9.24      |
| Co/Ce         | 1.31                    | 397.9       | 31.55     | 399.4   | 44.91     | 400.3      | 23.54     | -           | -         |
| Ce@NC         | 3.71                    | 398.1       | 35.18     | -       | -         | 400.2      | 50.50     | 401.3       | 14.32     |

Table S3. Catalytic hydrogenation of nitrobenzene or styrene

| Entry          | Catalyst | Substrate    | Conversion (%) | Selectivity (%)  |
|----------------|----------|--------------|----------------|------------------|
| 1 <sup>a</sup> | Co@NC    | nitrobenzene | 6.18±0.8       | >99 <sup>c</sup> |
| 2 <sup>a</sup> | Co/Ce@NC | nitrobenzene | 85.78±1.3      | >99 <sup>c</sup> |
| 3 <sup>b</sup> | Co@NC    | styrene      | 62.66±1.0      | >99 <sup>d</sup> |
| 4 <sup>b</sup> | Co/Ce@NC | styrene      | 96.14±1.7      | >99 <sup>d</sup> |

<sup>a</sup> Reaction Conditions: nitrobenzene (0.25 mmol); solvent: methanol (2.50 mL); 0.60 mol% catalyst; 140 °C; 2 MPa H<sub>2</sub>; 1 h.

<sup>b</sup> Reaction Conditions: styrene (0.13 mmol); solvent: methanol (2.50 mL); 1.20 mol% catalyst; 140 °C; 2 MPa H<sub>2</sub>; 4 h.

<sup>c</sup> Selectivity of aniline.

<sup>d</sup> Selectivity of ethylbenzene.

Table S4. Summary of catalyst consumption among reported non-noble metal-based catalysts for the HDO of vanillin.

|                                       | Catalyst                                     | Catalyst dosage <sup>a</sup> | Hydrogen Source | Solvent          | Conv. (%) <sup>b</sup> | Selec. (%) <sup>c</sup> | Ref. |
|---------------------------------------|----------------------------------------------|------------------------------|-----------------|------------------|------------------------|-------------------------|------|
| M@NC catalysts                        | Co/N-C-600                                   | 11.82 mol%                   | H <sub>2</sub>  | isopropanol      | 98.2                   | 85.1                    | S1   |
|                                       | ZnO/Co-N-CNT                                 | 21.48 mol%                   | H <sub>2</sub>  | water            | 100                    | 89.1                    | S2   |
|                                       | Co/NG <sub>8</sub> /CF                       | 19.42 mol%                   | H <sub>2</sub>  | water            | 95                     | >99                     | S3   |
|                                       | Co@NC-700                                    | 7.90 mol%                    | HCOOH           | water            | 95.7                   | 100                     | S4   |
|                                       | Co@NG-6                                      | 4.60 mol%                    | HCOOH           | water            | 98.5                   | 100                     | S5   |
|                                       | Co/Ce@NC                                     | 5.00 mol%                    | H <sub>2</sub>  | water or ethanol | >99                    | >99                     | This |
|                                       |                                              |                              | 10.00 mol%      | ethanol          | ethanol                | >99                     | >99  |
| Other non-noble metal-based catalysts | sulfided CoMo/Al <sub>2</sub> O <sub>3</sub> | not given                    | H <sub>2</sub>  | dodecane         | 53                     | 23                      | S6   |
|                                       | Co <sub>x</sub> P@POP                        | 8.26 mol%                    | H <sub>2</sub>  | isopropanol      | 99.3                   | 83.4                    | S7   |
|                                       | Ni/NCB-900                                   | 2.18 mol%                    | H <sub>2</sub>  | water            | 74.4                   | 64.6                    | S8   |
|                                       | SS-Ni/SiO <sub>2</sub>                       | 25.92 mol%                   | H <sub>2</sub>  | decalin          | 99.8                   | 89.0                    | S9   |
|                                       | Cu-PMO                                       | 11.41 mol%                   | H <sub>2</sub>  | methanol         | 100                    | 90                      | S10  |
|                                       | Ga-doped Cu/HNZY                             | 5.10 mol%                    | H <sub>2</sub>  | methanol         | 100                    | 99                      | S11  |
|                                       | Cu/AC-600                                    | 13.61 mol%                   | H <sub>2</sub>  | water            | 99.9                   | 93.2                    | S12  |
|                                       |                                              |                              | isopropanol     | isopropanol      | 99.8                   | 99.1                    |      |

<sup>a</sup> based on active metal component.

<sup>b</sup> Conversion of vanillin.

<sup>c</sup> Selectivity of creosol.

Table S5. General applicability of Co/Ce@NC for hydrodeoxygenation. <sup>a</sup>

| Entry          | Substrate                                                                           | Conversion (%) | Product                                                                              | Selectivity (%) |
|----------------|-------------------------------------------------------------------------------------|----------------|--------------------------------------------------------------------------------------|-----------------|
| 1 <sup>b</sup> | 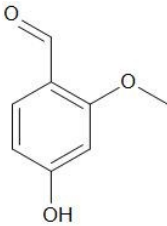   | >99            |    | >99             |
| 2 <sup>c</sup> |    | >99            |    | >99             |
| 3 <sup>d</sup> |   | 98.07          |   | >99             |
| 4 <sup>d</sup> |  | 98.40          |  | >99             |
| 5 <sup>e</sup> |  | 95.74          |  | 88.87           |
| 6 <sup>f</sup> |  | 97.43          |  | 92.00           |

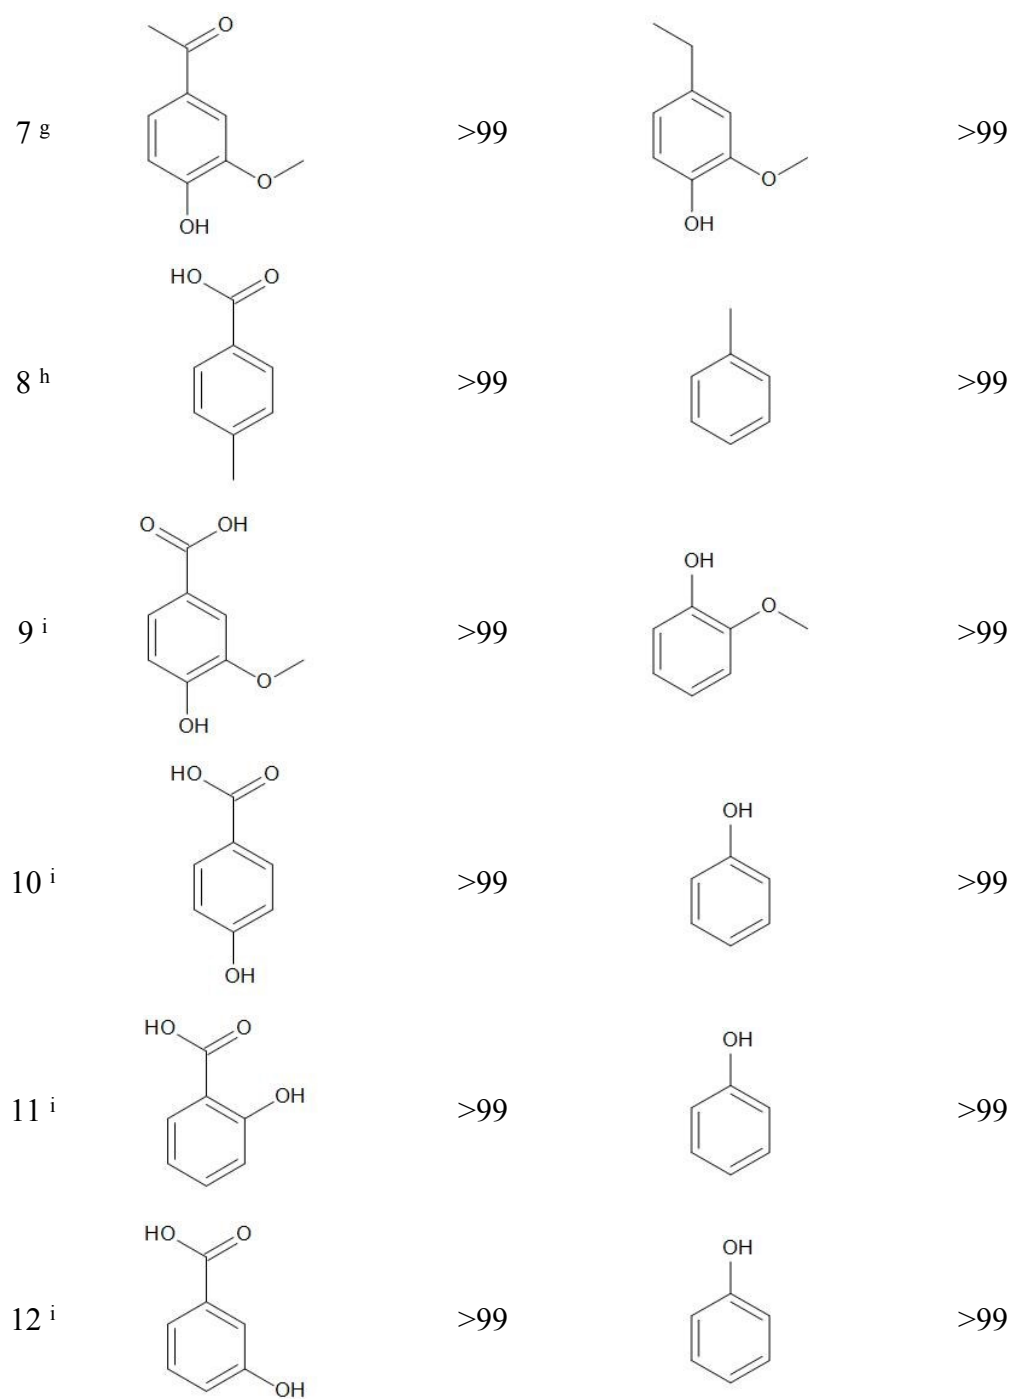

<sup>a</sup> Reaction conditions: substrate (0.13 mmol); 2 mL water; 5 mol% catalyst; 170 °C; 1 MPa H<sub>2</sub>. <sup>b</sup> 8 h. <sup>c</sup> 10 h. <sup>d</sup> 12 h. <sup>e</sup> 2 mL ethanol; 22 h. <sup>f</sup> 2 mL ethanol; 18 h. <sup>g</sup> 2 mL ethanol; 24 h. <sup>h</sup> 6 h. <sup>i</sup> 4 h.



Table S6. Selection of catalysts <sup>a</sup>

| Entry | Catalyst | Conversion (%) <sup>b</sup> | Selectivity (%) <sup>c</sup> |
|-------|----------|-----------------------------|------------------------------|
| 1     | Cu/Ce@NC | 6.93±0.5                    | >99                          |
| 2     | Co/Ce@NC | 85.78±1.3                   | >99                          |
| 3     | Ni/Ce@NC | 17.8±1.0                    | >99                          |
| 4     | Fe/Ce@NC | 3.38±0.6                    | >99                          |
| 5     | Co/Al@NC | 4.11±0.8                    | >99                          |
| 6     | Co/Si@NC | 29.87±1.0                   | >99                          |
| 7     | Co/Ti@NC | 12.76±1.1                   | >99                          |

<sup>a</sup> Reaction Conditions: nitrobenzene (0.25 mmol); solvent: methanol (2.50 mL); 10 mg catalyst; 140 °C; 2 MPa H<sub>2</sub>; 1 h.

<sup>b</sup> Conversion of nitrobenzene.

<sup>c</sup> Selectivity of aniline.

<sup>1</sup>H NMR spectra of the products:

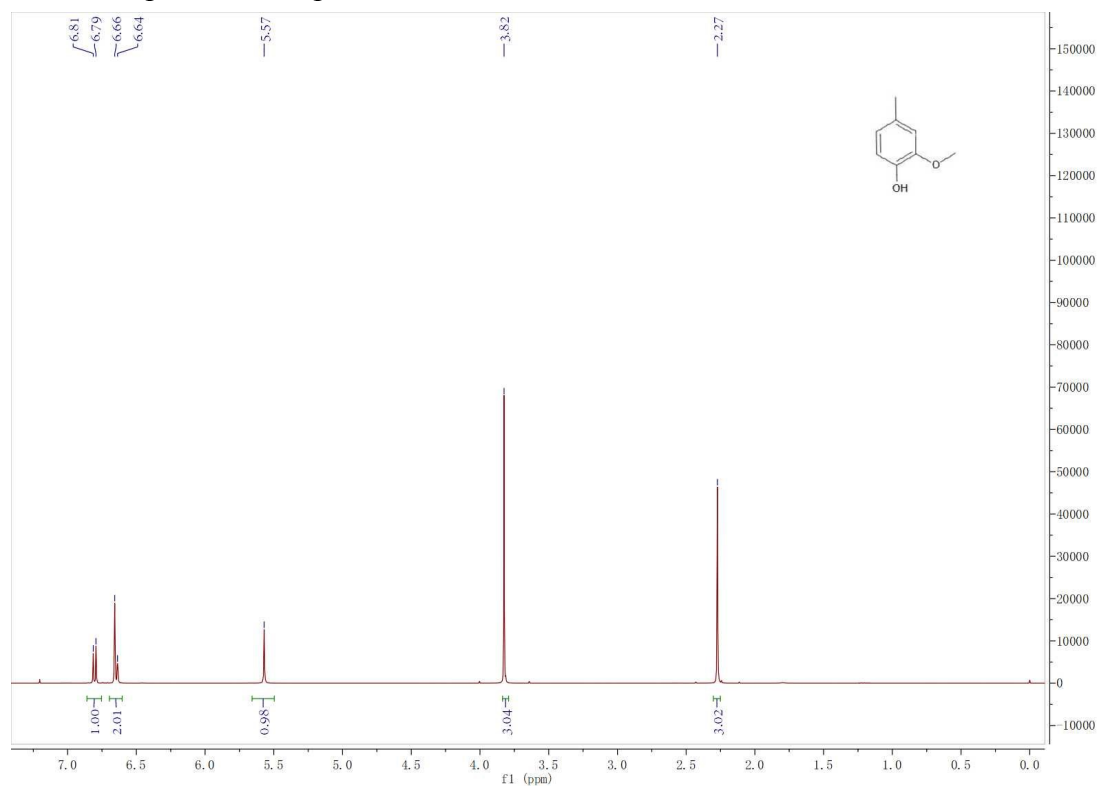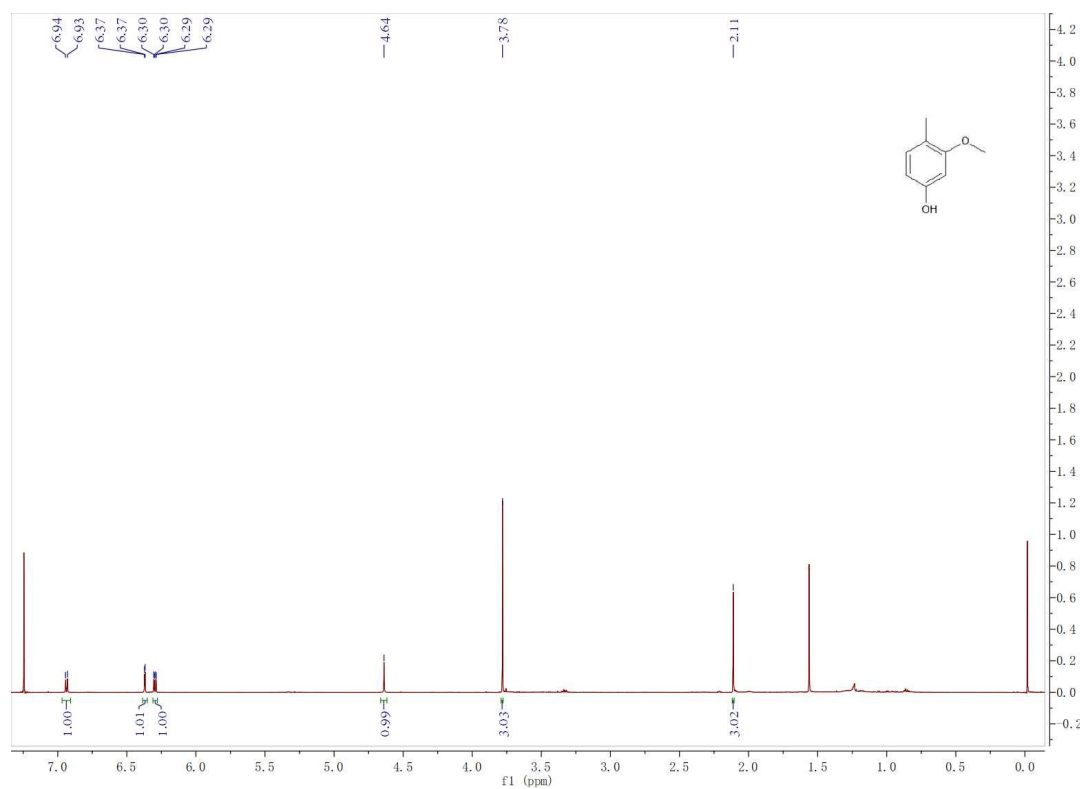

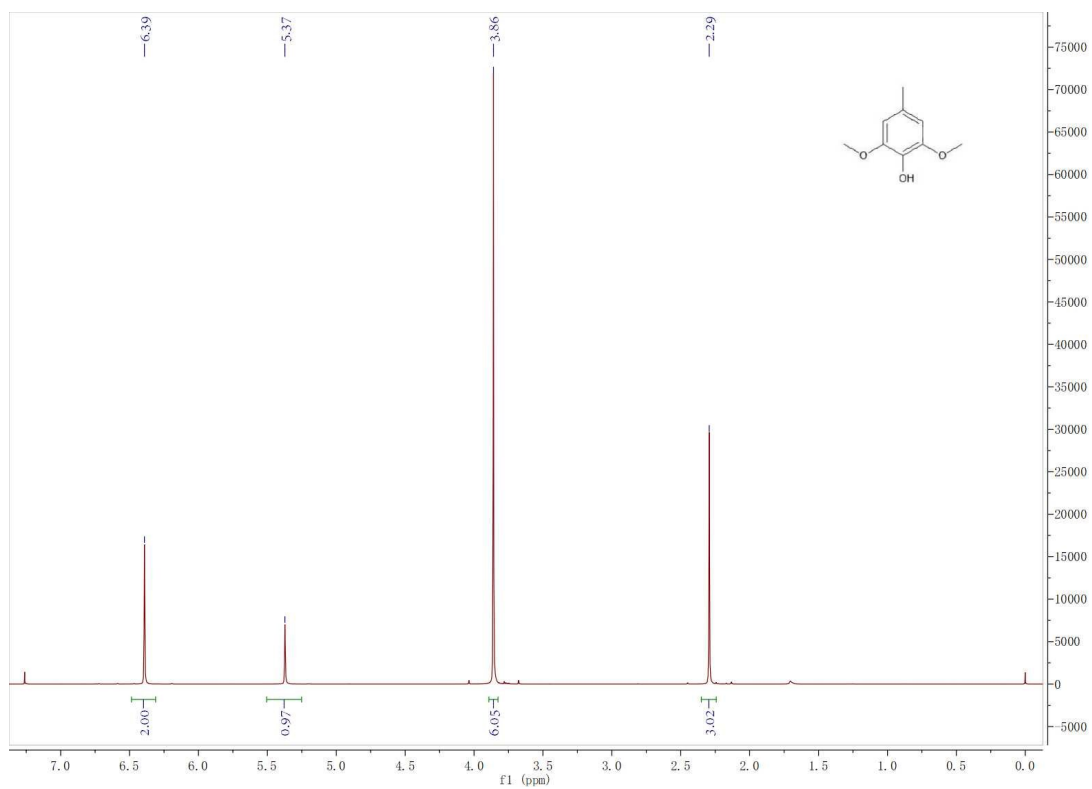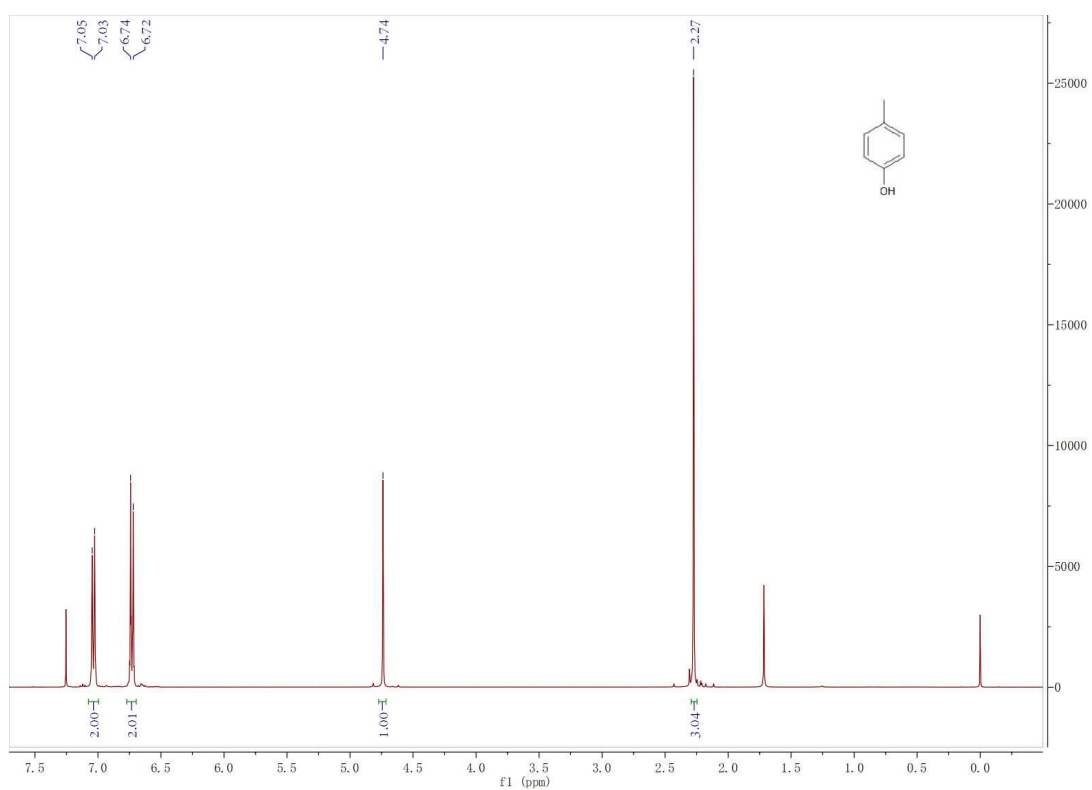

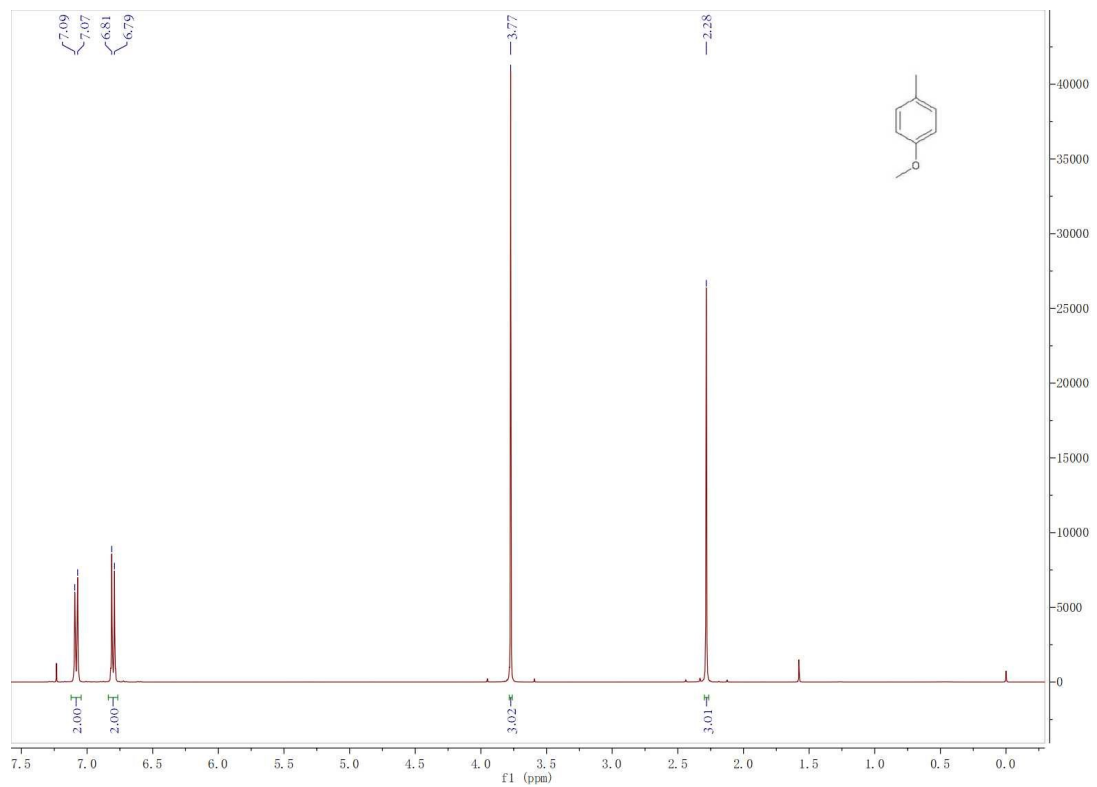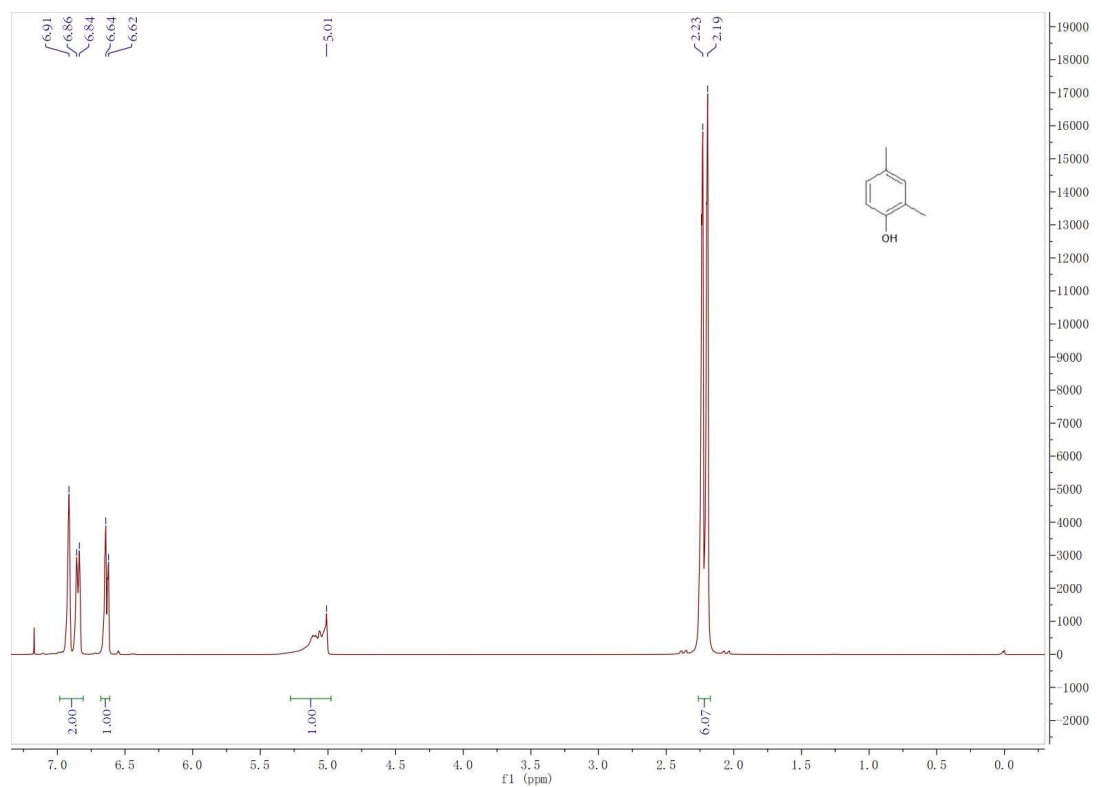

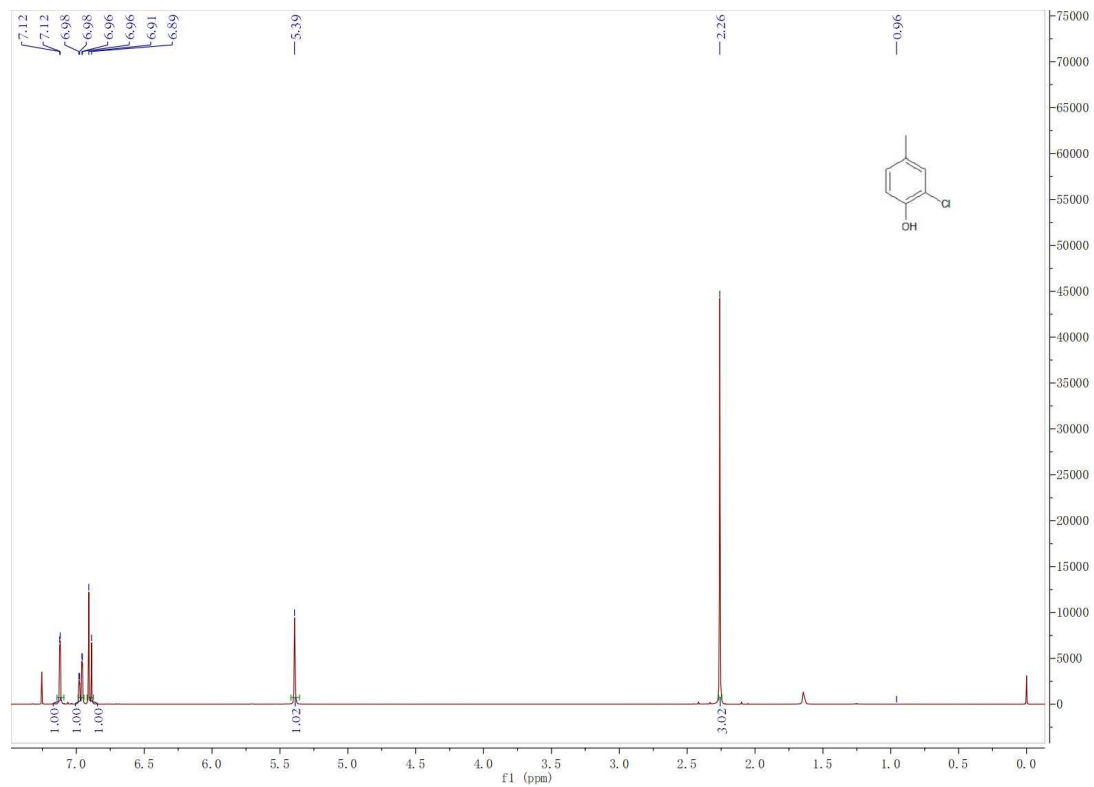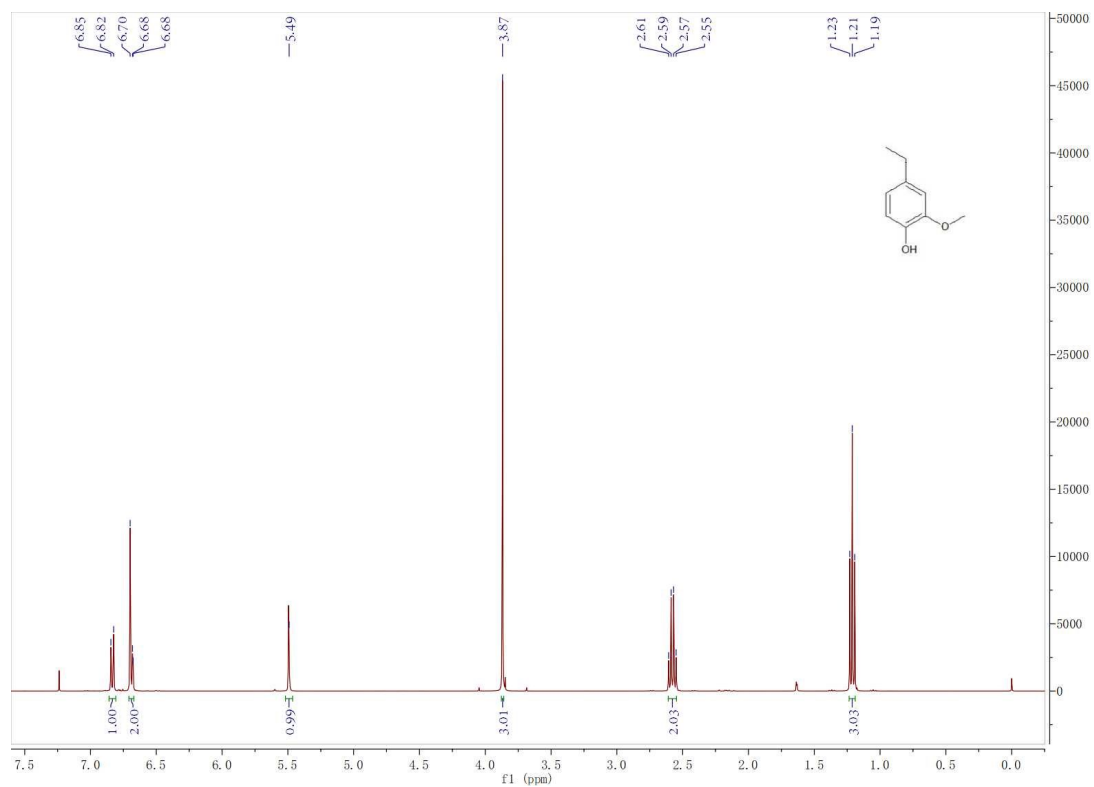

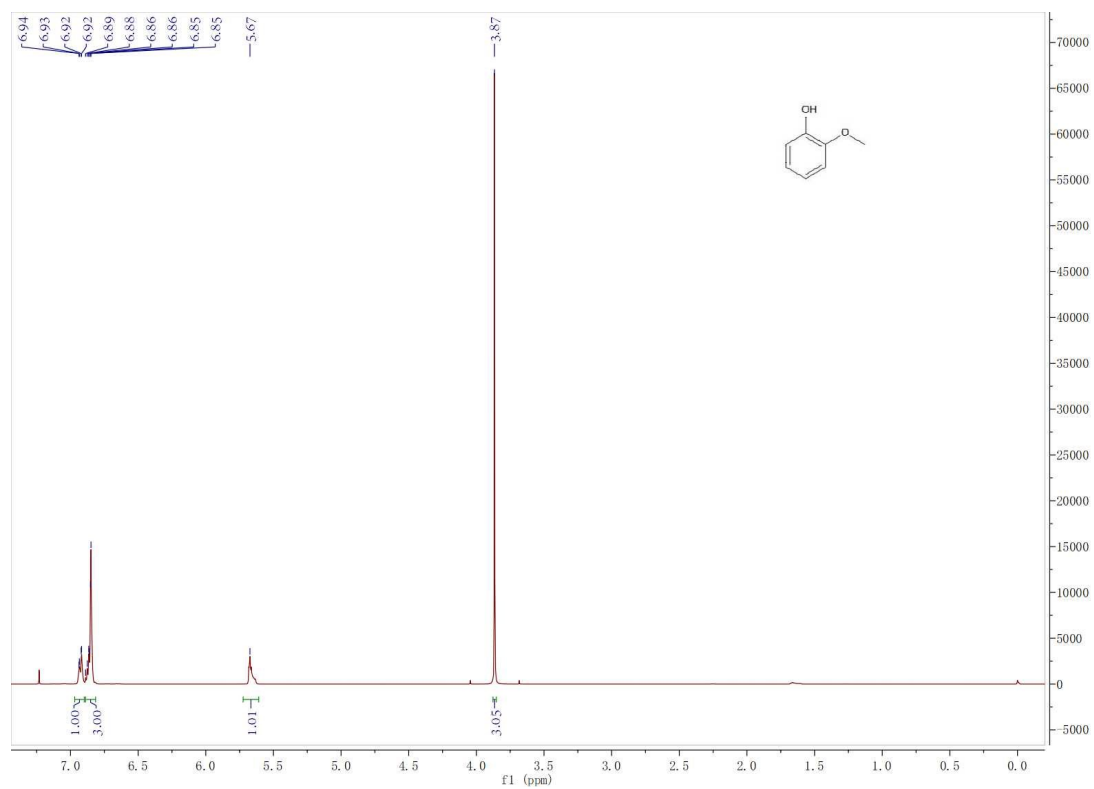

## References:

- [S1] L. Jiang, P. Zhou, C. Liao, Z. Zhang, S. Jin, *ChemSusChem*, 2018, **11**, 959-964.
- [S2] V. Ranaware, D. Verma, R. Insyani, A. Riaz, S. M. Kim, J. Kim, *Green Chem.*, 2019, **21**, 1021-1042.
- [S3] T. -J. Zhao, J. -J. Zhang, H. -H. Wang, J. Su, X. -H. Li, J. -S. Chen, *ChemSusChem*, 2020, **13**, 1900-1905.
- [S4] H. Yang, R. Nie, W. Xia, X. Yu, D. Jin, X. Lu, D. Zhou, Q. Xia, *Green Chem.*, 2019, **19**, 5714-5722.
- [S5] S. Zhou, F. Dai, C. Dang, M. Wang, D. Liu, F. Lu, H. Qi, *Green Chem.*, 2019, **21**, 4732-4747.
- [S6] A. L. Jongorius, R. Jastrzebski, P. C. A. Bruijninx, B. M. Weckhuysen, *J. Catal.*, 2012, **285**, 315-323.
- [S7] S. C. Shit, P. Koley, B. Joseph, C. Marini, L. Nakka, J. Tardio, *ACS Appl. Mater. Interfaces*, 2019, **11**, 24140-24153.
- [S8] R. Nie, H. Yang, H. Zhang, X. Yu, X. Lu, D. Zhou, Q. Xia, *Green Chem.*, 2017, **19**, 3126-3134.
- [S9] R. Shu, Q. Zhang, Y. Xu, J. Long, L. Ma, T. Wang, P. Chen, Q. Wu, *RSC Adv.*, 2016, **6**, 5214-5222.
- [S10] L. Petitjean, R. Gagne, E. S. Beach, D. Xiao, P. T. Anastas, *Green Chem.*, 2016, **18**, 150-156.
- [S11] D. Verma, R. Insyani, H. S. Cahyadi, J. Park, S. M. Kim, J. M. Cho, J. W. Bae, J. Kim, *Green Chem.*, 2018, **20**, 3253-3270.
- [S12] R. Fan, C. Chen, M. Han, W. Gong, H. Zhang, Y. Zhang, H. Zhao, G. Wang, *Small*, 2018, **14**, 1801953.
- [S13] G. Kresse, J. Furthmüller, *Comput. Mater. Sci.*, 1996, **6**, 15-50.
- [S14] G. Kresse, J. Furthmüller, *Phys. Rev. B*, 1996, **54**, 11169-11186.
- [S15] G. Henkelman, B. P. Uberuaga, H. Jónsson, *J. Chem. Phys.*, 2000, **113**, 9901-9904.
